# Supplementary material for: In vivo optochemical control of cell contractility at single‐cell resolution
Source: EMBO Rep. 2019 Oct 30;20(12):e47755. doi: 10.15252/embr.201947755 (PMC6893293; doi:10.15252/embr.201947755)
Supplement: Supplementary file 1 — Expanded View Figures PDF [file EMBR-20-e47755-s001.pdf]

## Expanded View Figures

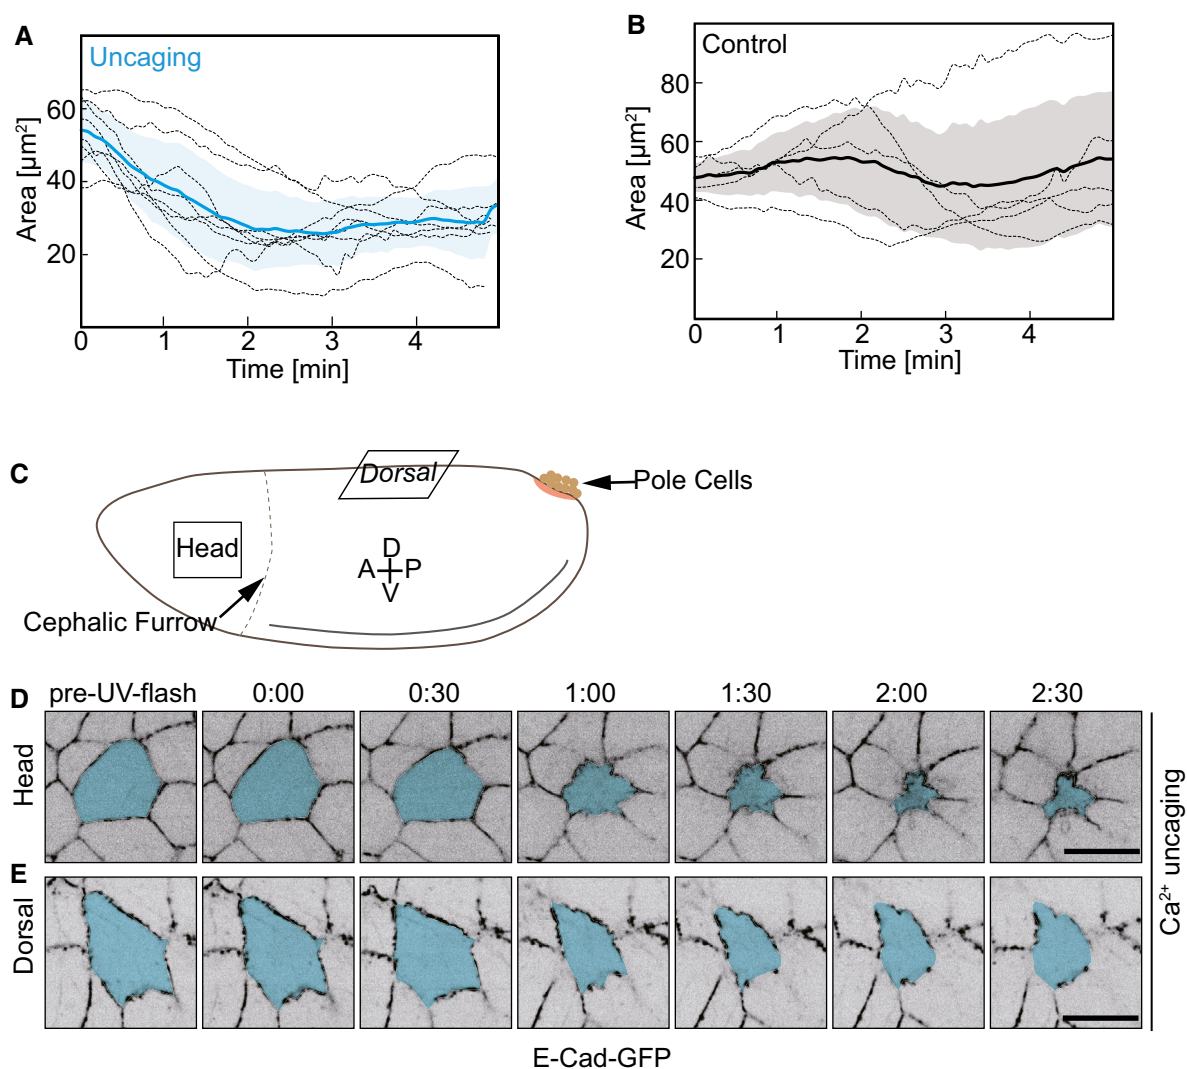

**Figure EV1. Cell contraction following CaLM in epithelium.**

A, B Cross-sectional cell areas of individual target cells (dashed lines) following a UV laser pulse. (A) Embryos injected with 2 mM NP-EGTA, AM ( $n = 8$  cells in eight embryos). (B) Embryos injected with buffer ( $n = 5$  cells in five embryos). Mean (bold line) with standard deviation of the mean (ribbon).

C Schematic drawing of an embryo shows the head and dorsal region where CaLM was performed.

D, E Images from a time-lapse recording embryos expressing E-Cad-GFP and injected with 2 mM NP-EGTA, AM following with Ca<sup>2+</sup> uncaging in head (D) or dorsal (E) region. Target cells are labeled in blue.

Data information: Scale bars: 10  $\mu\text{m}$  in (D, E).

**Figure EV2. CaLM does not induce apoptosis.**

A Images from embryos express  $\alpha$ -Catenin-RFP and apoptosensor. Two blue dotted boxes indicate the apoptotic cells. A yellow dotted box indicates the selected cell where CaLM was performed in the same embryos.

B Images of amnioserosa cells from two time-lapse recordings in embryos (stage 14) expressing E-Cad-GFP and injected with 1 mM NP-EGTA, AM followed by UV illumination showing long-term behavior after uncaging. The target cells for CaLM are highlighted in magenta.

C Cross-sectional area of target cells over 30 min after Ca<sup>2+</sup> uncaging. Cell contraction in 1 out of 3 target cells was reversible in 10 min.

Data information: Scale bars: 10  $\mu\text{m}$  in (A, B).

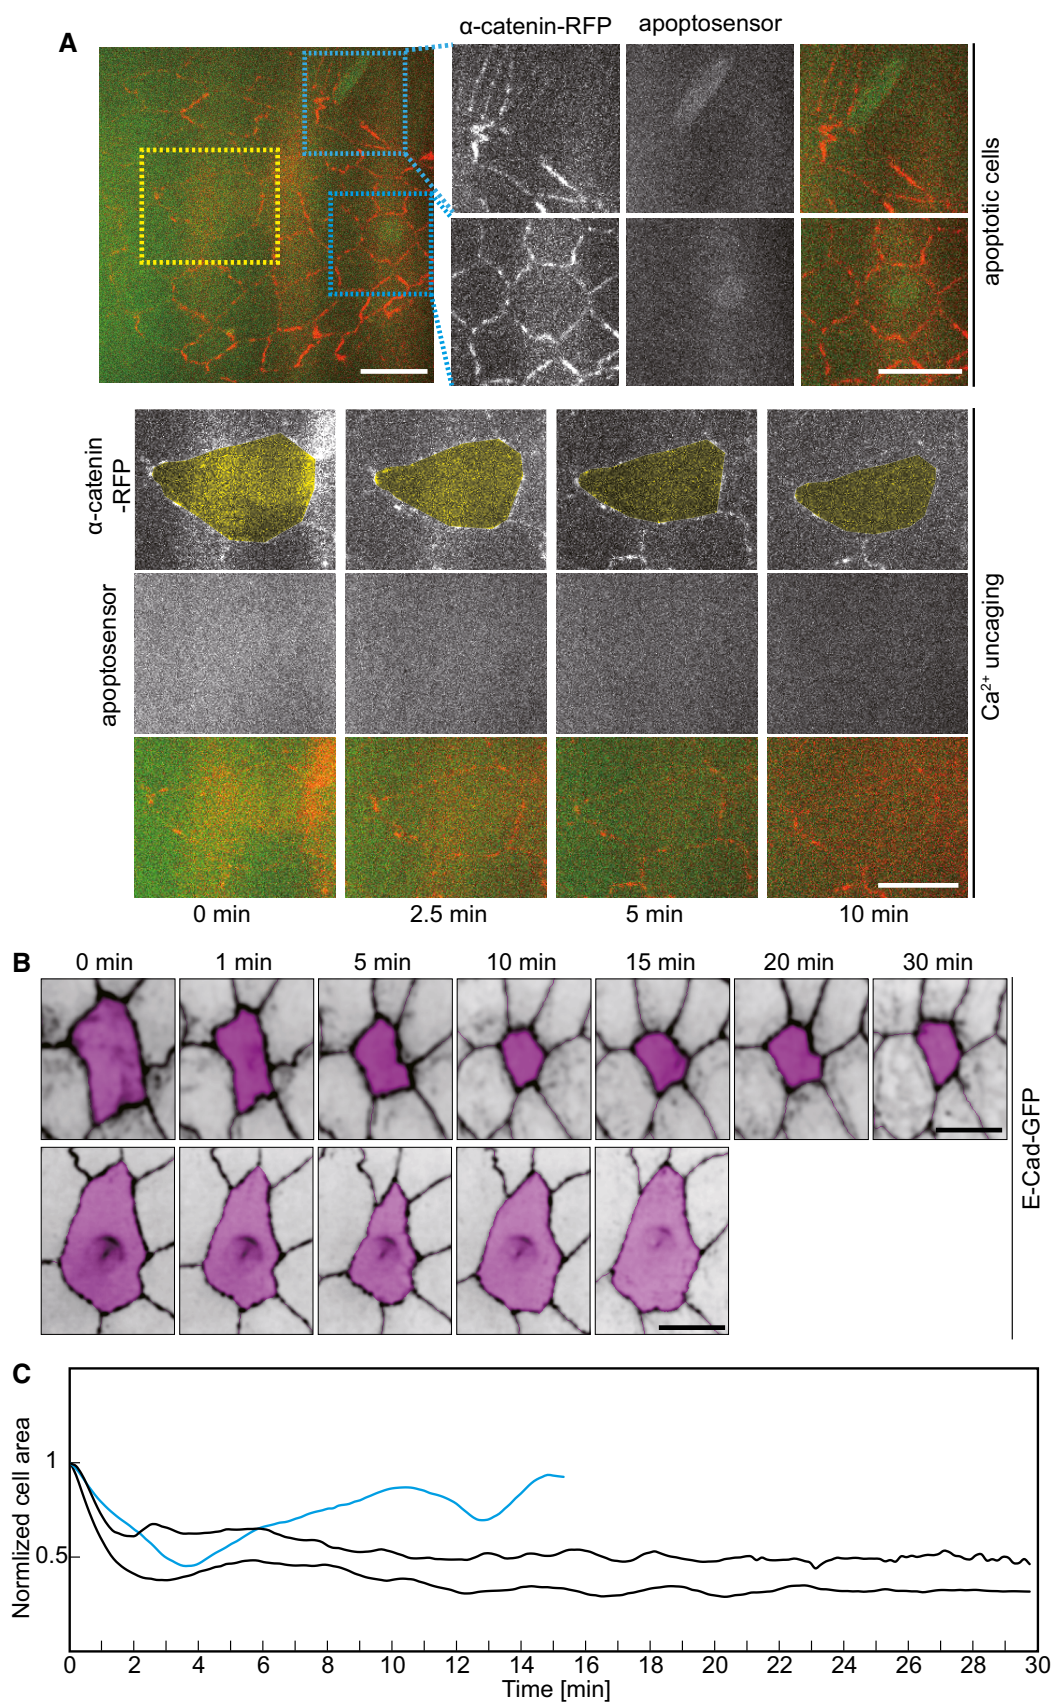

Figure EV2.

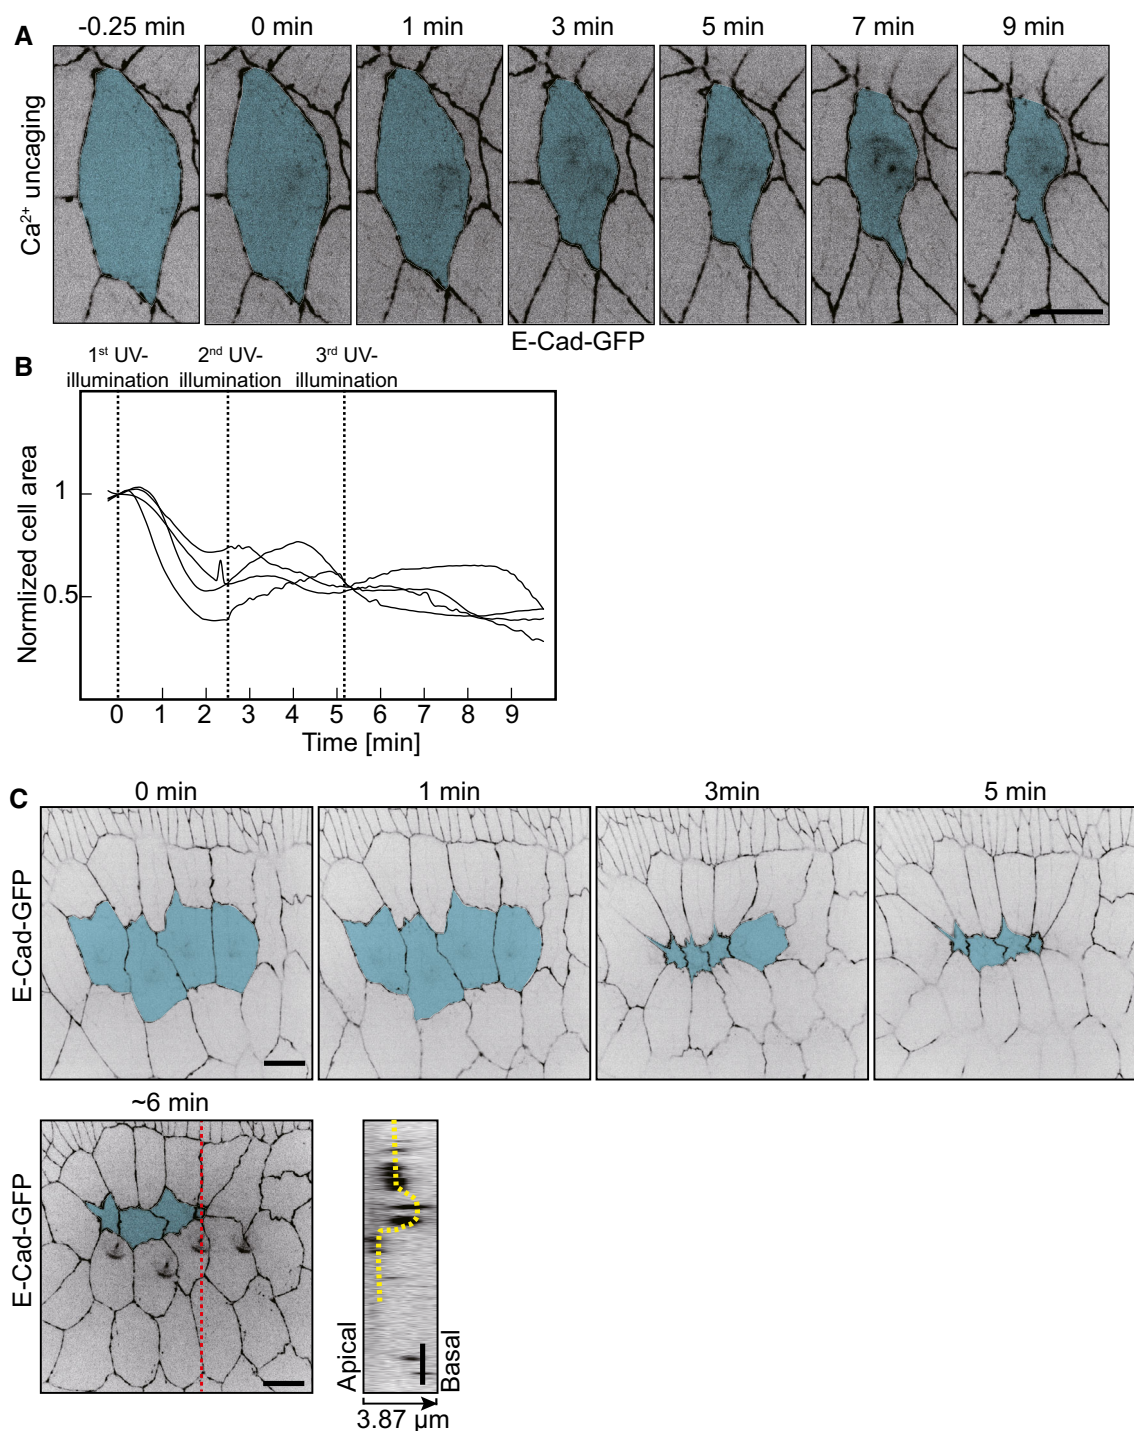

**Figure EV3. Cell contraction following CaLM in amnioserosa.**

**A** Images of amnioserosa from time-lapse recording in embryos (stage 14) expressing E-Cad-GFP and injected with 1 mM NP-EGTA, AM following with three times UV illumination (0, 2.5 and 5 min). Target cell is highlighted in blue.

**B** Cross-sectional cell areas of four individual target amnioserosa cells from the embryos injected with 1 mM NP-EGTA, AM following three times UV laser pulses. Cell area was normalized with the initial size (the first frame of recording after 1<sup>st</sup> UV illumination). The time points of UV laser pulses are indicated.

**C** CaLM triggers multiple cell constriction simultaneously in amnioserosa. Images of amnioserosa from a time-lapse recording in embryos (stage 14) expressing E-Cad-GFP and injected with 1 mM NP-EGTA, AM following with UV illumination. The target cells are highlighted in blue. An orthogonal view shows an invagination (yellow dash line) is induced by  $\text{Ca}^{2+}$  uncaging triggered contraction. The red dash line indicates the region of orthogonal view.

Data information: Scale bars: 10  $\mu\text{m}$  in (A, C).

**Figure EV4. VinculinD1 reporter, Rock inhibitor, *RhoGEF2* mutant, and Rho sensor.**

- A Scheme of the domain structure of Vinculin. Numbers indicate position of amino acid residues. Transgenic construct with the D1 domain (blue) fused to GFP and expressed under GAL4/UAS control.
  - B VinculinD1-GFP fluorescence on cell junctions of target and control cells ( $n = 6$  target cells and 6 control cell borders). Mean (bold line) with standard deviation of the mean (ribbon band).
  - C Scatter plot of normalized cross-sectional area with normalized VinculinD1-GFP intensity in target cells.
  - D The Rock inhibitor inhibits  $\text{Ca}^{2+}$ -induced constriction. Cross-sectional areas of eight individual target cells following CaLM in Y-27632 co-injected embryos.
  - E A confocal cross-sectional image from a *RhoGEF2* germline clone embryo expressing E-Cadherin-GFP shows the characteristic phenotype of multinucleated cells during cellularization. The red asterisks indicate multinucleated cells.
  - F Axial image stack of an embryo during cellularization showing the functionality of the Rho sensor.
  - G Images from time-lapse recording of an embryos expressing the Rho sensor. Cells in cytokinesis. Stage 8. Lateral epidermis.
- Data information: Scale bar: 10  $\mu\text{m}$  in (B, E, F, G).

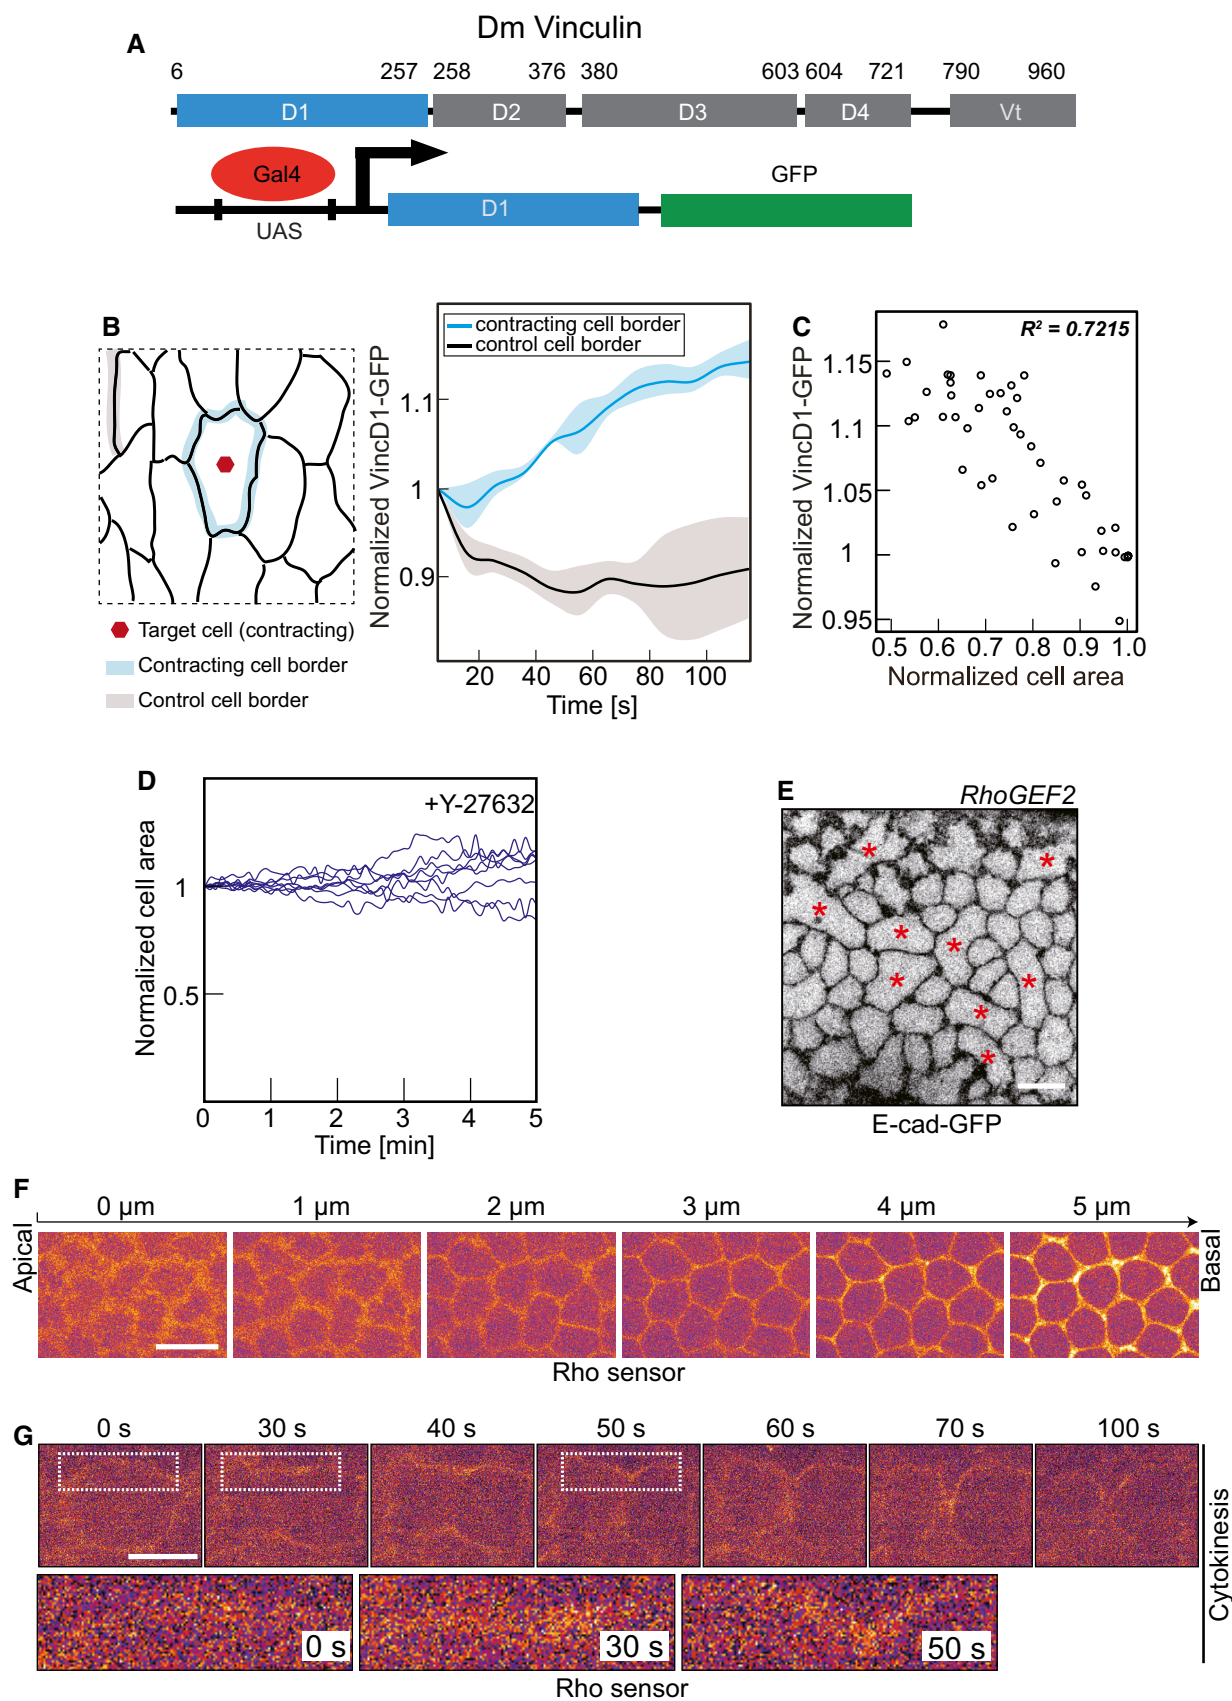

Figure EV4.

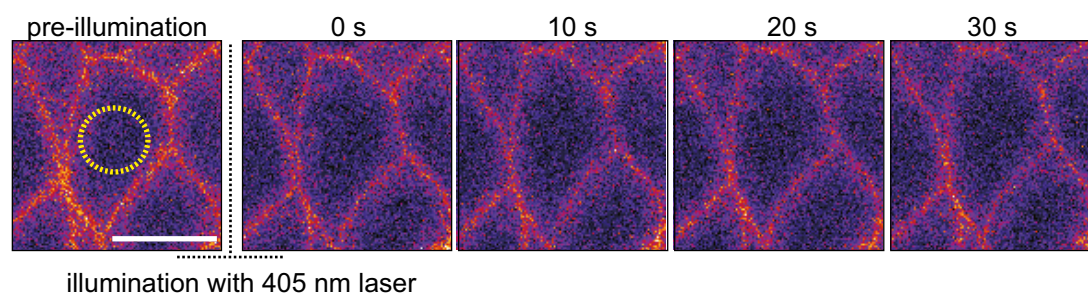

**Figure EV5. No increased signal of the GCaMP reporter after illumination by 405-nm laser in single individual cells.**

Images from time-lapse recording of embryos (stage 7, lateral epidermis) expressing a membrane-bound  $\text{Ca}^{2+}$  sensor (GCaMP6-myr) and injected with 2 mM NP-EGTA, AM. Target cells were exposed to a 405-nm cw laser.

Data information: Scale bars: 10  $\mu\text{m}$ .
